# Supplementary material for: Association between a Marine Healing Program and Metabolic Syndrome Components and Mental Health Indicators
Source: MDPI journal article supplement (doi:10.3390/medicina59071263), 2023-07-06
Supplement: s1 [file s1]

**Supplementary Table S1. Test of Normality**

| Variable          | Group        | Shapiro-Wilk |    |          |
|-------------------|--------------|--------------|----|----------|
|                   |              | Statistic    | df | p-value  |
| Height            | Experimental | 0.856        | 10 | 0.069    |
|                   | Control      | 0.640        | 11 | 0.000*** |
| Weight            | Experimental | 0.937        | 10 | 0.520    |
|                   | Control      | 0.951        | 11 | 0.658    |
| WC                | Experimental | 0.926        | 10 | 0.414    |
|                   | Control      | 0.667        | 11 | 0.000*** |
| SMM               | Experimental | 0.639        | 10 | 0.000*** |
|                   | Control      | 0.902        | 11 | 0.195    |
| BFM               | Experimental | 0.593        | 10 | 0.000*** |
|                   | Control      | 0.885        | 11 | 0.120    |
| BMI               | Experimental | 0.434        | 10 | 0.000*** |
|                   | Control      | 0.784        | 11 | 0.006**  |
| PBF               | Experimental | 0.517        | 10 | 0.000*** |
|                   | Control      | 0.863        | 11 | 0.063    |
| SBP               | Experimental | 0.887        | 10 | 0.157    |
|                   | Control      | 0.638        | 11 | 0.000*** |
| DBP               | Experimental | 0.912        | 10 | 0.291    |
|                   | Control      | 0.757        | 11 | 0.003**  |
| FBG               | Experimental | 0.951        | 10 | 0.675    |
|                   | Control      | 0.670        | 11 | 0.000*** |
| HbA1c             | Experimental | 0.887        | 10 | 0.157    |
|                   | Control      | 0.966        | 11 | 0.846    |
| AST               | Experimental | 0.938        | 10 | 0.532    |
|                   | Control      | 0.886        | 11 | 0.124    |
| ALT               | Experimental | 0.820        | 10 | 0.025*   |
|                   | Control      | 0.978        | 11 | 0.956    |
| Total Cholesterol | Experimental | 0.962        | 10 | 0.803    |
|                   | Control      | 0.872        | 11 | 0.083    |
| TG                | Experimental | 0.946        | 10 | 0.622    |
|                   | Control      | 0.833        | 11 | 0.026*   |
| HDL-C             | Experimental | 0.892        | 10 | 0.178    |
|                   | Control      | 0.903        | 11 | 0.199    |
| LDL-C             | Experimental | 0.915        | 10 | 0.321    |
|                   | Control      | 0.840        | 11 | 0.031*   |
| GGT               | Experimental | 0.805        | 10 | 0.017*   |
|                   | Control      | 0.711        | 11 | 0.001*** |
| UAC               | Experimental | 0.966        | 10 | 0.856    |
|                   | Control      | 0.956        | 11 | 0.721    |
| HADS              | Experimental | 0.936        | 10 | 0.514    |
|                   | Control      | 0.960        | 11 | 0.768    |
| EQ-5D-3L          | Experimental | 0.906        | 10 | 0.256    |
|                   | Control      | 0.760        | 11 | 0.003**  |
| BEPSI             | Experimental | 0.840        | 10 | 0.044*   |
|                   | Control      | 0.834        | 11 | 0.026*   |
| CSRS              | Experimental | 0.844        | 10 | 0.049*   |
|                   | Control      | 0.907        | 11 | 0.227    |

WC, waist circumference; SMM, skeletal muscle mass; BFM, body fat mass; BMI, body mass index; PBF, percent body fat; SBP, systolic blood pressure; DBP, diastolic blood pressure; FBG, fasting blood glucose; AST, aspartate aminotransaminase; ALT, Alanine aminotransferase; TG, triglyceride; HDL-C, high density lipoprotein cholesterol; LDL-C, low density lipoprotein cholesterol; GGT, gamma-glutamyl transpeptidase; UAC, uric-acid; HADS, hospital anxiety and depression scale; BEPSI, brief encounter psychological instrument; CSRS, cognitive stress response scale; \* $<0.05$ , \*\* $<0.01$ , \*\*\* $<0.001$



**Supplementary Table S2.** Comparison of Pre- and Post-test Results in the Experimental Group: Non-normal Variables

| Variable                 |     | N  | Average | SD    | z                  | p-value |
|--------------------------|-----|----|---------|-------|--------------------|---------|
| SMM (kg)                 | pre | 10 | 24.61   | 5.24  | -1.78 <sup>b</sup> | 0.075   |
|                          | pos | 10 | 21.53   | 8.09  |                    |         |
| BFM (kg)                 | pre | 10 | 20.41   | 7.10  | -1.72 <sup>b</sup> | 0.085   |
|                          | pos | 10 | 18.03   | 8.88  |                    |         |
| BMI (kg/m <sup>2</sup> ) | pre | 10 | 25.56   | 2.68  | -2.09 <sup>b</sup> | 0.036*  |
|                          | pos | 10 | 22.63   | 8.31  |                    |         |
| PBF (%)                  | pre | 10 | 31.81   | 9.20  | -1.17 <sup>b</sup> | 0.236   |
|                          | pos | 10 | 27.89   | 12.72 |                    |         |
| AST (IU/L)               | pre | 10 | 20.50   | 9.10  | -1.56 <sup>b</sup> | 0.120   |
|                          | pos | 10 | 18.40   | 5.36  |                    |         |
| GGT (IU/L)               | pre | 10 | 20.20   | 7.97  | -2.52 <sup>b</sup> | 0.012*  |
|                          | pos | 10 | 16.30   | 4.22  |                    |         |
| BEPSI (score)            | pre | 10 | 9.40    | 2.63  | -2.55 <sup>b</sup> | 0.011*  |
|                          | pos | 10 | 7.10    | 1.85  |                    |         |
| CSRS (score)             | pre | 10 | 10.60   | 13.01 | -.893 <sup>b</sup> | 0.372   |
|                          | pos | 10 | 8.70    | 10.07 |                    |         |

SMM, skeletal muscle mass; BFM, body fat mass; BMI, body mass index; PBF, percent body fat; AST, aspartate aminotransaminase; GGT, gamma-glutamyl transpeptidase; BEPSI, brief encounter psychological instrument; CSRS, cognitive stress response scale; \*<0.05 ; b: Based on negative ranks



**Supplementary Table S3.** Comparison of Pre- and Post-test Results in the Control Group: Non-normal Variables

|                          |     | Average | SD    | z                   | p-value |
|--------------------------|-----|---------|-------|---------------------|---------|
| Height (cm)              | pre | 153.46  | 7.31  | -1.753 <sup>b</sup> | 0.080   |
|                          | pos | 154.75  | 7.68  |                     |         |
| WC (cm)                  | pre | 94.96   | 7.08  | -.222 <sup>c</sup>  | 0.824   |
|                          | pos | 95.09   | 6.37  |                     |         |
| BMI (kg/m <sup>2</sup> ) | pre | 27.45   | 4.03  | -1.382 <sup>c</sup> | 0.167   |
|                          | pos | 26.67   | 3.88  |                     |         |
| SBP (mmHg)               | pre | 148.27  | 22.86 | -2.397 <sup>c</sup> | 0.017*  |
|                          | pos | 122.91  | 44.40 |                     |         |
| DBP (mmHg)               | pre | 82.27   | 19.95 | -1.159 <sup>c</sup> | 0.247   |
|                          | pos | 71.45   | 25.59 |                     |         |
| FBG (mg/dL)              | pre | 107.91  | 12.97 | -.533 <sup>b</sup>  | 0.594   |
|                          | pos | 103.73  | 41.00 |                     |         |
| TG (mg/dL)               | pre | 103.73  | 33.43 | -1.646 <sup>b</sup> | 0.100   |
|                          | pos | 131.18  | 52.15 |                     |         |
| LDL-C (mg/dL)            | pre | 96.73   | 34.68 | -2.449 <sup>c</sup> | 0.014*  |
|                          | pos | 84.18   | 29.94 |                     |         |
| GGT (IU/L)               | pre | 24.73   | 11.42 | -.060 <sup>c</sup>  | 0.952   |
|                          | pos | 26.36   | 16.84 |                     |         |
| EQ-5D-3L (score)         | pre | 7.09    | 1.81  | -2.047 <sup>b</sup> | 0.041*  |
|                          | pos | 5.45    | 2.21  |                     |         |
| CSRS (score)             | pre | 8.91    | 8.96  | -.534 <sup>c</sup>  | 0.594   |
|                          | pos | 9.27    | 9.47  |                     |         |

BMI, body mass index; SBP, systolic blood pressure; DBP, diastolic blood pressure; FBG, fasting blood glucose; TG, triglyceride; LDL-C, low density lipoprotein cholesterol; GGT, gamma-glutamyl transpeptidase; CSRS, cognitive stress response scale; \*<0.05 ; b: Based on negative ranks ; c: Based on positive ranks



**Supplementary Table S4.** Comparison of Pre- and Post-test Results Between the Experimental and Control Groups: Non-normal Variables

| Variable                 | Group | pre test |       | post test |       | Mean Rank | Z      | p-value |
|--------------------------|-------|----------|-------|-----------|-------|-----------|--------|---------|
|                          |       | Mean     | SD    | Mean      | SD    |           |        |         |
| Height (cm)              | Exp.  | 157.87   | 7.07  | 158.18    | 6.453 | 11.65     | -0.507 | 0.612   |
|                          | Cont. | 153.46   | 7.31  | 154.75    | 7.675 | 10.41     |        |         |
| WC (cm)                  | Exp.  | 92.25    | 6.11  | 90.90     | 4.514 | 9.55      | -1.022 | 0.307   |
|                          | Cont. | 94.96    | 7.08  | 95.09     | 6.371 | 12.32     |        |         |
| SMM (kg)                 | Exp.  | 24.61    | 5.24  | 21.53     | 8.085 | 14.15     | -2.220 | 0.026*  |
|                          | Cont. | 21.33    | 3.21  | 22.13     | 3.063 | 8.14      |        |         |
| BFM (kg)                 | Exp.  | 20.41    | 7.10  | 18.03     | 8.88  | 11.65     | -0.458 | 0.647   |
|                          | Cont. | 25.06    | 8.39  | 23.97     | 8.08  | 10.41     |        |         |
| BMI (kg/m <sup>2</sup> ) | Exp.  | 25.56    | 2.68  | 22.63     | 8.31  | 12.4      | -0.988 | 0.323   |
|                          | Cont. | 27.45    | 4.03  | 26.67     | 3.88  | 9.73      |        |         |
| PBF (%)                  | Exp.  | 31.81    | 9.20  | 27.89     | 12.72 | 11.1      | -0.07  | 0.944   |
|                          | Cont. | 38.24    | 8.85  | 36.38     | 8.51  | 10.91     |        |         |
| SBP (mmHg)               | Exp.  | 152.70   | 22.34 | 134.20    | 9.05  | 11.55     | -0.388 | 0.698   |
|                          | Cont. | 148.27   | 22.86 | 122.91    | 44.40 | 10.5      |        |         |
| DBP (mmHg)               | Exp.  | 81.60    | 15.95 | 78.10     | 10.53 | 10.55     | -0.317 | 0.751   |
|                          | Cont. | 82.27    | 19.95 | 71.45     | 25.59 | 11.41     |        |         |
| FBG (mg/dL)              | Exp.  | 121.50   | 23.80 | 117.80    | 19.64 | 12.1      | -0.778 | 0.437   |
|                          | Cont. | 107.91   | 12.97 | 103.73    | 41.00 | 10        |        |         |
| ALT (IU/L)               | Exp.  | 20.50    | 9.10  | 18.40     | 5.36  | 13.55     | -1.808 | 0.071   |
|                          | Cont. | 26.91    | 10.23 | 28.00     | 11.53 | 8.68      |        |         |
| TG (mg/dL)               | Exp.  | 113.10   | 57.22 | 79.50     | 40.32 | 14.7      | -2.606 | 0.009** |
|                          | Cont. | 103.73   | 33.43 | 131.18    | 52.15 | 7.64      |        |         |
| LDL-C (mg/dL)            | Exp.  | 101.80   | 39.63 | 101.90    | 39.89 | 9         | -1.411 | 0.158   |
|                          | Cont. | 96.73    | 34.68 | 84.18     | 29.94 | 12.82     |        |         |
| GGT (IU/L)               | Exp.  | 20.20    | 7.97  | 16.30     | 4.22  | 14.05     | -2.167 | 0.03*   |
|                          | Cont. | 24.73    | 11.42 | 26.36     | 16.84 | 8.23      |        |         |
| EQ-5D-3L (score)         | Exp.  | 7.30     | 1.34  | 5.90      | 1.37  | 11.3      | -0.216 | 0.829   |
|                          | Cont. | 7.09     | 1.81  | 5.45      | 2.21  | 10.73     |        |         |
| BEPSI (score)            | Exp.  | 9.40     | 2.63  | 7.10      | 1.85  | 11.7      | -0.501 | 0.617   |
|                          | Cont. | 10.27    | 3.50  | 8.00      | 2.24  | 10.36     |        |         |
| HADS (score)             | Exp.  | 10.80    | 7.33  | 7.30      | 6.31  | 12.95     | -1.38  | 0.167   |
|                          | Cont. | 12.27    | 6.92  | 7.82      | 5.74  | 9.23      |        |         |

WC, waist circumference; SMM, skeletal muscle mass; BFM, body fat mass; BMI, body mass index; PBF, percent body fat; SBP, systolic blood pressure; DBP, diastolic blood pressure; FBG, fasting blood glucose; ALT, Alanine aminotransferase; TG, triglyceride LDL-C, low density lipoprotein cholesterol; GGT, gamma-glutamyl transpeptidase; BEPSI, brief encounter psychological instrument; HADS, hospital anxiety and depression scale, HADS; \*<0.05, \*\*<0.01.
